# Supplementary material for: Factor XIII B Subunit Polymorphisms and the Risk of Coronary Artery Disease
Source: MDPI journal article supplement (doi:10.3390/ijms16011143), 2015-01-06
Supplement: s1 [file s1]

## Supplementary Information

**Table S1.** FXIII-B p.His95Arg and intron K nt29756 C>G genotype distribution in control and patient groups: The effect of polymorphisms on the risk of coronary artery disease.

| Subjects                           | Population Controls<br><i>n</i> = 994 | CAS-MI-<br><i>n</i> = 237 | CAS+MI-<br><i>n</i> = 214 | CAS+MI+<br><i>n</i> = 210 | CAS+<br><i>n</i> = 424 | MI+<br><i>n</i> = 236 |
|------------------------------------|---------------------------------------|---------------------------|---------------------------|---------------------------|------------------------|-----------------------|
| <b>p.His95Arg</b>                  |                                       |                           |                           |                           |                        |                       |
| Wild-type <i>n</i>                 | 831 (83.6%)                           | 202 (85.2%)               | 189 (88.3%)               | 180 (85.7%)               | 369 (87.0%)            | 203 (86.0%)           |
| Heterozygote <i>n</i>              | 155 (15.6%)                           | 33 (14.0%)                | 25 (11.7%)                | 30 (14.3%)                | 55 (13.0%)             | 33 (14.0%)            |
| Homozygote <i>n</i>                | 8 (0.8%)                              | 2 (0.8%)                  | –                         | –                         | –                      | –                     |
| Arg95 carrier frequency            | 16.4%                                 | 14.8%                     | 11.7%                     | 14.3%                     | 13.0%                  | 14.0%                 |
| Arg95 allele frequency             | 8.6%                                  | 7.8%                      | 5.8%                      | 7.1%                      | 6.5%                   | 7.0%                  |
| OR for Arg95 carriers non-adjusted | –                                     | –                         | 0.74<br>(0.48, 1.14)      | 0.83<br>(0.55, 1.25)      | 0.79<br>(0.57, 1.08)   | 0.80<br>(0.54, 1.19)  |
| OR for Arg95 carriers adjusted     | –                                     | –                         | 0.80<br>(0.50, 1.29)      | 0.87<br>(0.55, 1.38)      | 0.81<br>(0.56, 1.18)   | 0.83<br>(0.53, 1.29)  |
| <b>Intron K nt29756 C&gt;G</b>     |                                       |                           |                           |                           |                        |                       |
| Wild-type <i>n</i>                 | 712 (71.6%)                           | 158 (66.7%)               | 155 (72.4%)               | 151 (71.9%)               | 306 (72.2%)            | 173 (73.3%)           |
| Heterozygote <i>n</i>              | 259 (26.1%)                           | 74 (31.2%)                | 52 (24.3%)                | 55 (26.2%)                | 107 (25.2%)            | 59 (25.0%)            |
| Homozygote <i>n</i>                | 23 (2.3%)                             | 5 (2.1%)                  | 7 (3.3%)                  | 4 (1.9%)                  | 11 (2.6%)              | 4 (1.7%)              |
| G carrier frequency                | 28.4%                                 | 33.3%                     | 27.6%                     | 28.1%                     | 27.8%                  | 26.7%                 |
| G allele frequency                 | 15.3%                                 | 17.7%                     | 15.4%                     | 15.0%                     | 15.2%                  | 14.2%                 |
| OR for G carriers non-adjusted     | –                                     | –                         | 0.98<br>(0.70, 1.36)      | 0.98<br>(0.70, 1.36)      | 0.98<br>(0.76, 1.26)   | 0.91<br>(0.66, 1.26)  |
| OR for G carriers adjusted         | –                                     | –                         | 1.06<br>(0.73, 1.54)      | 1.06<br>(0.73, 1.54)      | 1.03<br>(0.77, 1.39)   | 0.99<br>(0.69, 1.42)  |

The ORs were calculated by comparing different patient groups with the population control group. The respective 95% CIs are shown in parenthesis below the OR values. ORs were adjusted for gender and age. CAS+ and CAS–, patients with and without coronary atherosclerosis, respectively; MI+ and MI–, patients with and without a history of myocardial infarction, respectively; OR, odds ratio.
